# Supplementary material for: Supramolecular host–guest interaction of trityl-nitroxide biradicals with cyclodextrins: modulation of spin–spin interaction and redox sensitivity
Source: Royal Society of Chemistry journal article supplement (doi:10.1039/c5ob02450a), 2015-12-18
Supplement: c5ob02450a1.pdf [file c5ob02450a1.pdf]

## Supramolecular host-guest interaction of trityl-nitroxide biradicals with cyclodextrins: modulation of spin-spin interaction and redox sensitivity

Xiaoli Tan,<sup>†</sup> Yuguang Song,<sup>\*,†</sup> Huiqiang Liu,<sup>†</sup> Qinwen Zhong,<sup>\*,‡</sup> Antal Rockenbauer,<sup>#</sup> Frederick A. Villamena,<sup>§,£</sup> Jay L. Zweier,<sup>§</sup> Yangping Liu<sup>\*,†,§</sup>

<sup>†</sup>Tianjin Key Laboratory on Technologies Enabling Development of Clinical Therapeutics and Diagnostics, School of Pharmacy, Tianjin Medical University, Tianjin 300070, P. R. China

<sup>‡</sup>The First Affiliated Hospital, Gannan Medical University, Jiangxi 341000, P. R. China

<sup>§</sup>Center for Biomedical EPR Spectroscopy and Imaging, The Davis Heart and Lung Research Institute, the Division of Cardiovascular Medicine, Department of Internal Medicine, The Ohio State University, Columbus, Ohio 43210, United States

<sup>#</sup>Institute of Materials and Environmental Chemistry, Hungarian Academy of Sciences and, Department of Physics, Budapest University of Technology and Economics, Budafoki ut 8, 1111 Budapest, Hungary

<sup>£</sup>Department of Pharmacology, College of Medicine, The Ohio State University, Columbus, Ohio 43210, United States

Corresponding authors: Yangping Liu, Yuguang Song and Qinwen Zhong

Email Address: [songyuguang@tmu.edu.cn](mailto:songyuguang@tmu.edu.cn); [awen7758ilu@163.com](mailto:awen7758ilu@163.com); [liuyangping@tmu.edu.cn](mailto:liuyangping@tmu.edu.cn).

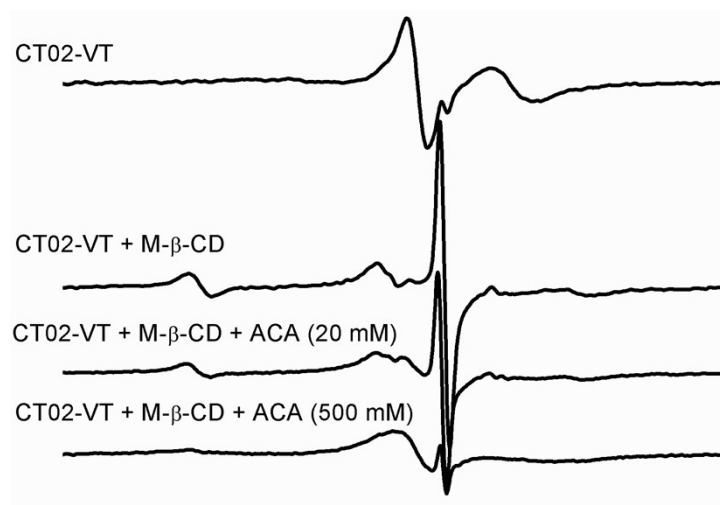

Figure S1. Competitive inclusion of CT02-VT (50  $\mu\text{M}$ ) and 1-adamantane carboxylic acid (ACA) with M- $\beta$ -CD (100 mM) in phosphate buffer (pH 7.4, 20 mM).

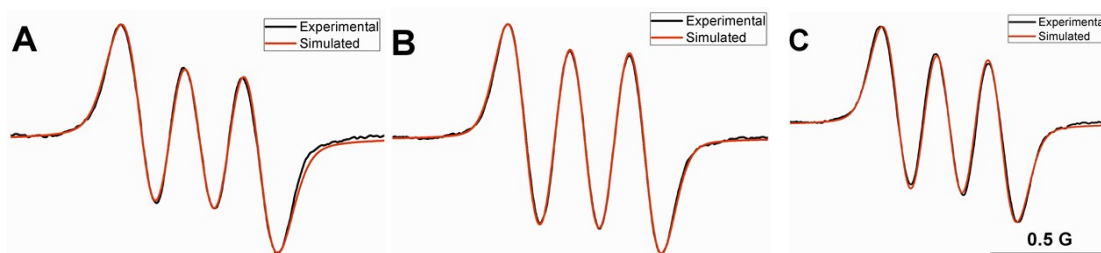

Figure S2. Experimental and simulated EPR spectra of trityl-hydroxylamine monoradicals obtained from the reduction of TN biradicals CT02-GT (A), CT02-AT (B) and CT02-VT (C) by ascorbate. Each TN biradical (50  $\mu\text{M}$ ) reacted with ascorbate (200  $\mu\text{M}$ ) in PBS (20 mM, pH 7.4). After two and half hours, the solution containing the trityl-hydroxylamine monoradicals was transferred into a gas-permeable Teflon tube (i.d. = 0.8 mm) and sealed at both ends. The sealed sample was placed inside a quartz EPR tube with open ends. Nitrogen gas was allowed to bleed into the EPR tube and after about 4 min EPR spectra were recorded. The following acquisition parameters were used: microwave power, 0.1 mW; modulation frequency, 10 kHz; time constant, 0.01 ms; conversion time, 5.12 ms; modulation amplitude, 0.02 G.

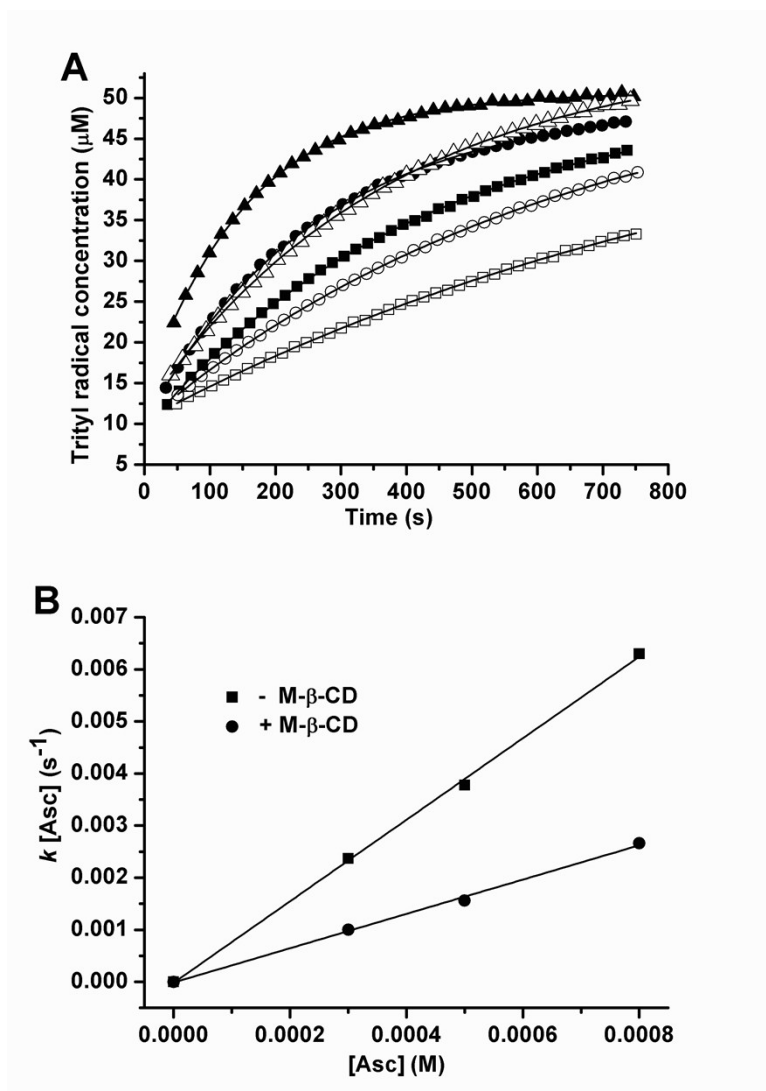

Figure S3. (A) Plot of the concentrations of trityl monoradicals as a function of time which were generated by the reaction of CT02-AT ( $50 \mu\text{M}$ ) with  $300 \mu\text{M}$  (square),  $500 \mu\text{M}$  (circle) and  $800 \mu\text{M}$  (triangle) of ascorbic acid in the presence (unfilled) or absence (filled) of M- $\beta$ -CD ( $50 \text{ mM}$ ) in phosphate buffer ( $50 \text{ mM}$ , pH 7.4). (B) Plot of  $k[\text{Asc}]$  as a function of the concentrations of ascorbic acid. Values of  $k[\text{Asc}]$  were obtained according to the data shown in Fig. S3 A. Linear regression of kinetic data to yield the second-order rate constants for reduction of CT02-AT by ascorbic acid in the presence (circle) or absence (square) of M- $\beta$ -CD. Data were shown in Table 2.

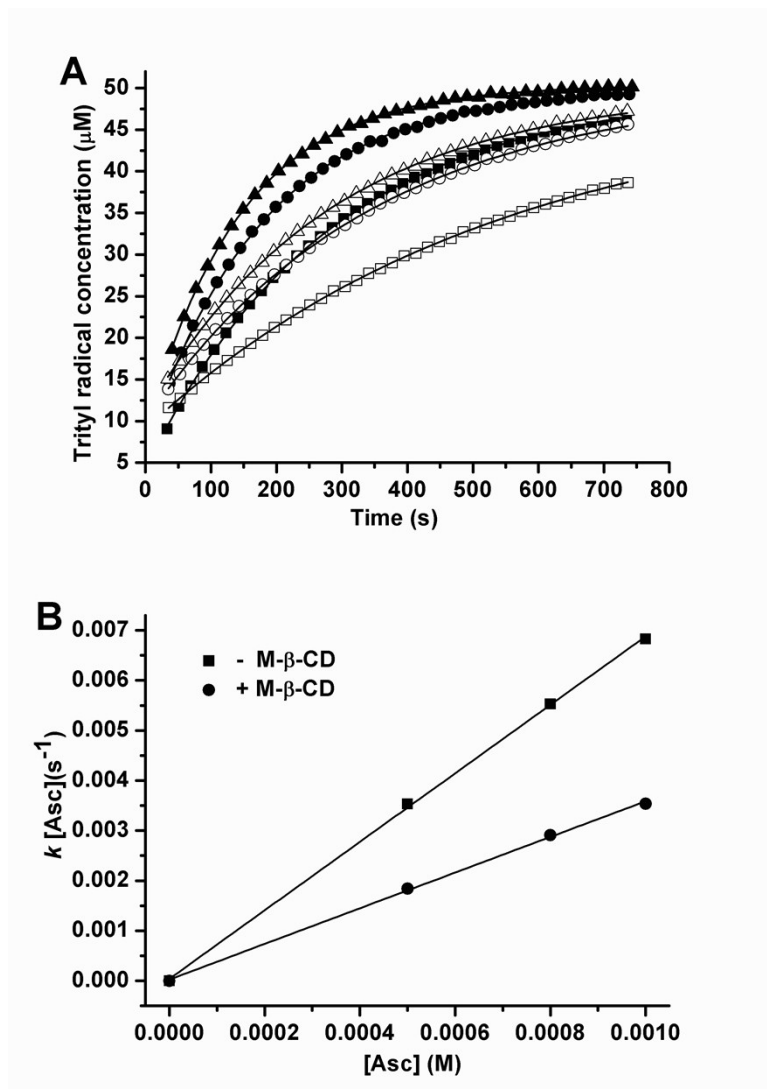

Figure S4. (A) Plot of the concentrations of trityl monoradicals as a function of time which were generated by the reaction of CT02-VT ( $50 \mu\text{M}$ ) with  $500 \mu\text{M}$  (square),  $800 \mu\text{M}$  (circle) and  $1000 \mu\text{M}$  (triangle) of ascorbic acid in the presence (unfilled) or absence (filled) of M- $\beta$ -CD ( $50 \text{ mM}$ ) in phosphate buffer ( $50 \text{ mM}$ , pH 7.4). (B) Plot of  $k[\text{Asc}]$  as a function of the concentrations of ascorbic acid. Values of  $k[\text{Asc}]$  were obtained according to the data shown in Fig. S4 A. Linear regression of kinetic data to yield the second-order rate constants for reduction of CT02-VT by ascorbic acid in the presence (circle) or absence (square) of M- $\beta$ -CD. Data were shown in Table 2.
